# Supplementary material for: A DyP-Type Peroxidase of Pleurotus sapidus with Alkene Cleaving Activity
Source: MDPI journal article supplement (doi:10.3390/molecules25071536), 2020-03-27
Supplement: s1 [file s1]

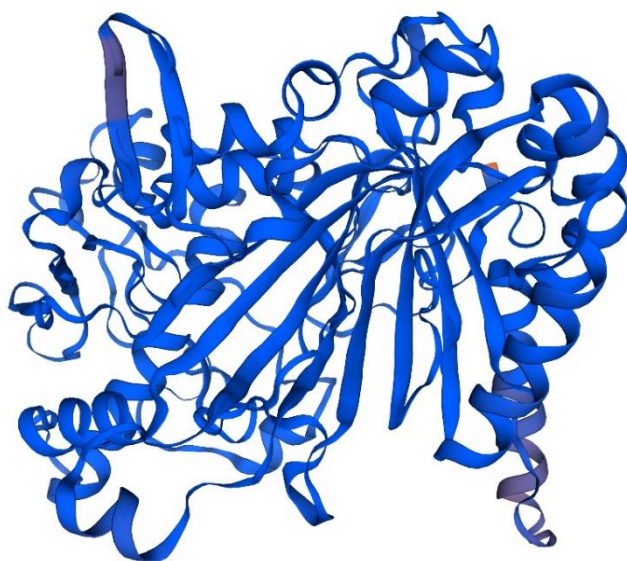

**Figure 1.** Structural homology model of PsalPOX. The model was generated with the SWISS-MODEL server using the X-ray crystal structure of *Pleos-DyP4* (PDB-ID 6fsk).

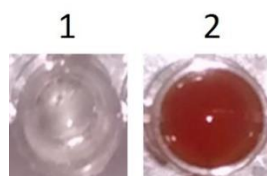

**Figure 2.** Detection of hydrogen peroxide in the IEX fraction with *o*-dianisidine and HRP in the presence of *trans*-anethole after 1 h of incubation at pH 6.0 and RT. 1: blank (buffer instead of IEX fraction); 2: IEX fraction. *o*-Dianisidine was oxidized to a red-brown colorant by HRP in the presence of H<sub>2</sub>O<sub>2</sub>.

|            |                                                                                                                                                            |     |
|------------|------------------------------------------------------------------------------------------------------------------------------------------------------------|-----|
| KDQ29984.1 | mlhqsyypyltshlawlptslasafvywrgidplifprsrlnrhnlragrrmihtdnrvvgqgdwr                                                                                         | 65  |
| KDQ29972.1 | -----mhlflr---lliacv                                                                                                                                       | 12  |
| ESK85927.1 | -----mfsiyp                                                                                                                                                | 6   |
| KLO09144.1 | -----mk-ail---s                                                                                                                                            | 6   |
| THU81532.1 | -----mt---vk-flvaacv                                                                                                                                       | 11  |
| <br>       |                                                                                                                                                            |     |
| KDQ29984.1 | --glrssiatssstydyviigggtaglavanrlsedplvsiaievieagnaeahlrevfipglf---g                                                                                       | 125 |
| KDQ29972.1 | --glrssiatssaydyviigggtaglavasrlsedpsvsivvieagnaeahlepevfipglf---g                                                                                         | 72  |
| ESK85927.1 | avivilslhsafsdydvviigggtagltvasrlaeddsqvavieaganaehrpdvfipgmkgqig                                                                                          | 71  |
| KLO09144.1 | yflvlqlalrsfavfdyvivvggtagltvasrlsedpsvtvavieagnaeahnlepevfvpqli---                                                                                        | 68  |
| THU81532.1 | aalapvanvlassydyiiigggtgltvasrlaedksnqvlvlaegnpaeglqevfvpgli---g<br>*: :*: *: *:*:*:*:*       *: :*: *     *: :*: :                                        | 73  |
| <br>       |                                                                                                                                                            |     |
| KDQ29984.1 | sgqaalttlwnaykttppmlnnrslvnagr <del>vlggsttinamlfpragraqydawaelnr</del> dawg                                                                               | 190 |
| KDQ29972.1 | sggaftttlwnaynttpqmllnnsrlvnagr <del>vlggsttinamlfpragraqdawaelnr</del> dawg                                                                               | 137 |
| ESK85927.1 | vgtkppelnwayktvpqthlngrvltvnagralggstvinamifprakkeqydawgilnndtswt                                                                                          | 136 |
| KLO09144.1 | tqgsfttlwnayrtvpqvnlnsnrltnvagkalggstiinsimifpraekedydwgalnndsswt                                                                                          | 133 |
| THU81532.1 | tqgsfttlwnayrtapgenlnnrtltnvagkalggstiinsimifpraekaagydwagtlnndsswt<br>*     *****.* **   *.***.***       *: :*: *     *: :*: *                            | 138 |
| <br>       |                                                                                                                                                            |     |
| KDQ29984.1 | wdallpfrrservtppdafqnagsvtyvypevhgsa-sdgrkvkgypnfiffegstlwraqaavav                                                                                         | 254 |
| KDQ29972.1 | wdallpfrrservtppdafqneggityvevhgsa-sdgrkvkgypnfiffegstlwraqaavav                                                                                           | 201 |
| ESK85927.1 | weallpfkrsesftvpndfqasn-garydpqghfgd---gslkvgfpnfyfpqemlwqntsigt                                                                                           | 197 |
| KLO09144.1 | wdallpfknseiftppnafqsas-grvrdpsvhgfs---grvhvgfnpfffeqsqlwktsesgl                                                                                           | 194 |
| THU81532.1 | wdallpfkkseiftppnafqrnd-gatfrvdvhgfnesegvrkvgnfnffpqstlwrtzsmj<br>*: :*: *.** . * *: *       .       *       *: :*: *   * . *     :: :                     | 202 |
| <br>       |                                                                                                                                                            |     |
| KDQ29984.1 | gfpgerdlasgdpqhgvsvpesidvtnytrcsaacayftpfasrpfnvitnatvtrrivwdtpsp                                                                                          | 319 |
| KDQ29972.1 | gfpgerdlasgdpqhgvsvpesidvtnytrcsaacayftpfasrpfnvitnatvtrvvwdtpss                                                                                           | 266 |
| ESK85927.1 | gfpaatlslngephavgppsfidaingtrcsacaftytfadpnpftitnanvtriwseen                                                                                               | 262 |
| KLO09144.1 | gfpaaspdlangphavgvapdslnaantrcsaacayftpfaerpntfvlnatvstriiwsnst                                                                                            | 259 |
| THU81532.1 | gfpaaspdlangsphavgvapdsldaanntrcsaacyftpfaeqnpftvlnatvtriwtasaq<br>***.   *: :*.**.*** : * :*: . * *****.:****.:***.: :*.**: **:*                          | 267 |
| <br>       |                                                                                                                                                            |     |
| KDQ29984.1 | gshsnegqrnlraiaavefvragrnsr--tesvtvrrevvvsagtigtprvfelsgignssiiraagv                                                                                       | 383 |
| KDQ29972.1 | gshsdksqrnlraiaavefvragrnsr--tesvtvrrevvvsagtigtpkelfelsgignssiiraagv                                                                                      | 330 |
| ESK85927.1 | n-----sslatagevyytnnetm---tlevtgevilsgigtisgskilelsignstilaaagv                                                                                            | 317 |
| KLO09144.1 | an-----agstkaiaveyasngtllga---sverevivsagigtispkvlslsgvgnatiltaagv                                                                                         | 317 |
| THU81532.1 | nd-----stltasgevuidslnqtscrailsrkgevivsagigtisgskilelsgvgnstilqaagi<br>. * .*: :                       *: :*: :*: :*: :*: :*: :* : *                       | 326 |
| <br>       |                                                                                                                                                            |     |
| KDQ29984.1 | npvlelpvsgenlag-----lltsfpgslgl                                                                                                                            | 409 |
| KDQ29972.1 | npvlelpvsgenlagef-----clltsfpgslgl                                                                                                                         | 358 |
| ESK85927.1 | epllldiptvgenla-----gmayaavsktligi                                                                                                                         | 342 |
| KLO09144.1 | qpqvnlstvgenladhvhnwvnsftsfnltkdl-lnnatflaeqlwlwnktrtgllsaaprslgi                                                                                          | 381 |
| THU81532.1 | spaldiptvgenladhvwswanafnisltkdalllntdfaqqglidlwfknrtglysaaprslgi<br>. * : * : * : ****                                                       : : :   *: : | 391 |
| <br>       |                                                                                                                                                            |     |
| KDQ29984.1 | pgplnifndttrilptllqeakanlhfhalfangnallegkiragehiveirlyaddvalpens-                                                                                          | 473 |
| KDQ29972.1 | pgplnifndtgitptllqeakanlhfhalfangnallegkiragehiveirlyaddvalpensl                                                                                           | 424 |
| ESK85927.1 | tapldvvsqsl-ldtlltqaesnlsnyasqfsgnnpdlargleaqhrlafslsqenqqlcveln-                                                                                          | 406 |
| KLO09144.1 | aapsnvfnqsg-ltalvtqsrantlataisfsgnadlakgiaaqldhalslyaedkelplemn-                                                                                           | 444 |
| THU81532.1 | aapsndvfeese-fnrllinqeeslsrfasefsgnnpklakgiesqyralslrqnelplemn-<br>* : :*: : :       : ln:nq. *   * : *** *   * : *   * : *   * : *                        | 454 |
| <br>       |                                                                                                                                                            |     |
| KDQ29984.1 | ----lfpgyaga-aadrpqrnyttimnvlyaplrsgrthitssdirtapvvdpayymhplda                                                                                             | 530 |
| KDQ29972.1 | caallsyfpyyaga-aadrpqrnyttimnvlyaplrsgrthitssdirtapvvdpayymhplda                                                                                           | 487 |
| ESK85927.1 | ----ldagyvgptplesrplrnfittvstilyaplarsgrhisssdpftvplvdpaywahpmdv                                                                                           | 465 |
| KLO09144.1 | ----lepysgptplavrpnrtfftintvlyaplrsgrthitsspsvppadvpnpyyahpmdi                                                                                             | 503 |
| THU81532.1 | ----lepysgptaadfardpynrtainslvlyplsgrthitsspslapvvdpaywahpldv<br>* *               * * .*: : :   *: :*: :*: :*: :* .   * * * * :   *: *                    | 513 |
| <br>       |                                                                                                                                                            |     |
| KDQ29984.1 | athaaginlaraktlitppmdsiylgefepgkdvtspqdissvlraaivssdnhvtgmtammpek                                                                                          | 595 |
| KDQ29972.1 | athaaginlarartlitppmdsiylgefepgkdvtspqdissvlraaivssdnhvtgmtammqel                                                                                          | 552 |
| ESK85927.1 | aiahvgigialakmlrsppldsiydefefegve--sdkeinwlrgr-atstdnhvtgtlsmmprel                                                                                         | 527 |
| KLO09144.1 | aahiggirlarmltspplgdsflgefepgaekevdaqigswlrn-atsdnhetgtlaamprel                                                                                            | 567 |
| THU81532.1 | aihqvagiklarkmlqssplsstyegefegtcketdaeiewlrgv-vasdnhevgsilaamlpkdm<br>* : .*: .*: : * : :*: :   * : * .   . : **** . * : :*: : :                           | 577 |
| <br>       |                                                                                                                                                            |     |
| KDQ29984.1 | ggvvdtelrvygignvr <del>vadasiiipvpsha</del> ststvymigeraadlikhrspl-----                                                                                    | 649 |
| KDQ29972.1 | ggvvdtelrvygieenvr <del>vadasiiipvpsha</del> tvplrillithladlqpvdchldwraresilwv                                                                             | 622 |
| ESK85927.1 | ggvvdteqlkyvigtmnrvvdasvipfpvashtaeststvymigeraadiirksgn-----                                                                                              | 580 |
| KLO09144.1 | ggvvdtnlkvygtanrvrvdasiiipfisahasistvyaigekevrgsd-----                                                                                                     | 614 |
| THU81532.1 | ggvvdteillygtsnrvrvdasvipfisaahlsssvymigeraadiikrn-----<br>*****.* **   ****.**: :*: :*       : : : : :                                                    | 627 |
| <br>       |                                                                                                                                                            |     |
| KDQ29984.1 | -----                                                                                                                                                      | 649 |
| KDQ29972.1 | lllaafltrvlrlqissisivdihcnhl                                                                                                                               | 644 |
| ESK85927.1 | -----                                                                                                                                                      | 580 |
| KLO09144.1 | -----                                                                                                                                                      | 614 |
| THU81532.1 | -----                                                                                                                                                      | 627 |

**Figure 3.** Alignment of the hypothetical protein (KDQ29984.1) from *P. ostreatus*, which was the best hit for the 75 kDa band of the IEX fraction by a homology search against the public database NCBI, and other members of the GMC oxidoreductase family. KDQ29972.1: hypothetical protein from *P. ostreatus* (92% identity to KDQ29984.1); ESK85927.1: glucose oxidase from *Moniliophthora roreri* (57% identity to KDQ29984.1); KLO09144.1: alcohol oxidase from *Schizopora paradoxa* (56% identity to KDQ29984.1); THU81532.1: alcohol oxidase from *Dendrothele bispora* (55% identity to KDQ29984.1). Asterisks indicate conserved residues, colons equivalent residues and dots partial residue conservation. Peptides identified by protein sequencing are underlined. Alignment was performed with Clustal Omega (European Bioinformatics Institute, Hinxton, UK).

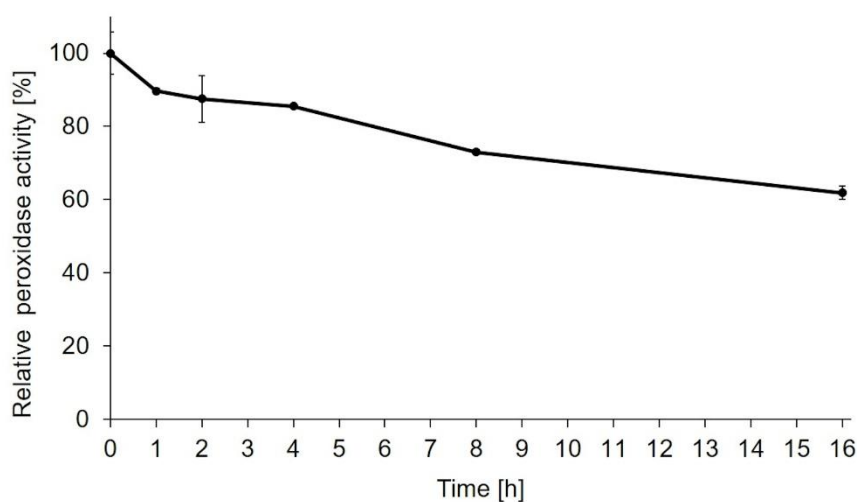

**Figure 4.** Stability of PsaPOX during biotransformation of *trans*-anethole over 16 h. The reaction was performed in the presence of 100  $\mu$ M  $H_2O_2$  and 25 mM  $MnSO_4$  in 100 mM sodium acetate buffer pH 3.5 at RT. Relative peroxidase activity [%] was defined as the percentage of activity detected with respect to the starting activity. Values are the average of triplicate experiments with standard deviations shown as error bars.

**Table 1.** *p*-Anisaldehyde concentration after biotransformation of *trans*-anethole with different basidiomycetes.

| strain                                         | <i>p</i> -anisaldehyde concentration [mM] | origin                 |
|------------------------------------------------|-------------------------------------------|------------------------|
| <i>Pleurotus sapidus</i>                       | 5.36                                      | DSMZ, strain no. 2866  |
| <i>Pleurotus eryngii</i>                       | 4.07                                      | CBS, strain no. 613.91 |
| <i>Pleurotus ostreatus</i>                     | 3.74                                      | DSMZ, strain no. 1020  |
| <i>Pleurotus ostreatus</i> var. <i>florida</i> | 2.00                                      | Laboratory collection  |
| <i>Pleurotus sajor-caju</i>                    | 1.14                                      | DSMZ, strain no. 5339  |
| <i>Pleurotus pulmonarius</i>                   | 1.04                                      | DSMZ, strain no. 5331  |
| <i>Trametes versicolor</i> *                   | 0.96                                      | Laboratory collection  |
| <i>Trametes suaveolens</i>                     | 0.62                                      | DSMZ, strain no. 5237  |
| <i>Pleurotus lampas</i>                        | 0.79                                      | CBS, strain no. 323.49 |
| <i>Lentinus lepideus</i>                       | 0.29                                      | CBS, strain no. 450.79 |
| <i>Wolfiporia cocos</i>                        | 0.18                                      | CBS, strain no. 279.55 |
| <i>Gloeophyllum odoratum</i>                   | 0.18                                      | CBS, strain no. 444.61 |
| <i>Piptoporus soleniensis</i>                  | 0.17                                      | CBS, strain no. 492.76 |
| <i>Schizophyllum commune</i>                   | 0.10                                      | DSMZ, strain no. 1024  |
| <i>Gloeophyllum trabeum</i>                    | 0.00                                      | DSMZ, strain no. 3087  |
| <i>Phanerochaete chrysosporium</i>             | 0.00                                      | DSMZ, strain no. 1547  |

\* Two variants of the strain were tested for the bioconversion. The results for the strain with higher *p*-anisaldehyde concentrations are presented.

DSMZ: Deutsche Sammlung von Mikroorganismen und Zellkulturen GmbH, CBS: Westerdijk Fungal Biodiversity Institute

**Table 2.** *p*-Anisaldehyde concentration after biotransformation of *trans*-anethole with the active IEX fraction in the presence or absence of Mn<sup>2+</sup> and/or H<sub>2</sub>O<sub>2</sub> for 16 h at RT. The *p*-anisaldehyde concentrations are the average of duplicate experiments with indication of standard deviations.

| MnSO <sub>4</sub> concentration [mM] | H <sub>2</sub> O <sub>2</sub> concentration [μM] | <i>p</i> -anisaldehyde concentration [μM] |
|--------------------------------------|--------------------------------------------------|-------------------------------------------|
| 0                                    | 0                                                | 30 ± 1                                    |
| 1                                    | 0                                                | 450 ± 17                                  |
| 1                                    | 50                                               | 600 ± 12                                  |

**Table 3.** *p*-Anisaldehyde concentration after bioconversion of *trans*-anethole by recombinant PsaPOX with and without addition of H<sub>2</sub>O<sub>2</sub> and Mn<sup>2+</sup> for 16 h at RT. The *p*-anisaldehyde concentrations are the average of duplicate experiments with indication of standard deviations.

| MnSO <sub>4</sub> concentration [mM] | H <sub>2</sub> O <sub>2</sub> concentration [μM] | <i>p</i> -anisaldehyde concentration [μM] |
|--------------------------------------|--------------------------------------------------|-------------------------------------------|
| 0                                    | 0                                                | 0 ± 0                                     |
| 0                                    | 100                                              | 189 ± 6                                   |
| 25                                   | 100                                              | 320 ± 20                                  |

**Table 4.** *p*-Anisaldehyde concentration after biotransformation of *trans*-anethole, (*E*)-methyl isoeugenol, and  $\alpha$ -methylstyrene by recombinant PsaPOX (1 U/mL) in the presence of 100 μM H<sub>2</sub>O<sub>2</sub> and 25 mM MnSO<sub>4</sub> for 16 h at pH 3.5 and RT. The values are the average of duplicate experiments with indication of standard deviations.

| Substrate                      | Product                | Product concentration active enzyme [μM] | Product concentration inactivated enzyme (control) [μM] |
|--------------------------------|------------------------|------------------------------------------|---------------------------------------------------------|
| <i>trans</i> -anethole         | <i>p</i> -anisaldehyde | 342 ± 20                                 | 22 ± 7                                                  |
| ( <i>E</i> )-methyl isoeugenol | veratraldehyde         | 114 ± 12                                 | 48 ± 9                                                  |
| $\alpha$ -methylstyrene        | acetophenone           | 24 ± 7                                   | 0 ± 0                                                   |
